# Supplementary material for: Human iPSC-Derived 2D and 3D Platforms for Rapidly Assessing Developmental, Functional, and Terminal Toxicities in Neural Cells
Source: MDPI journal article supplement (doi:10.3390/ijms22041908), 2021-02-14
Supplement: s1 [file s1]

## Supplemental Figures

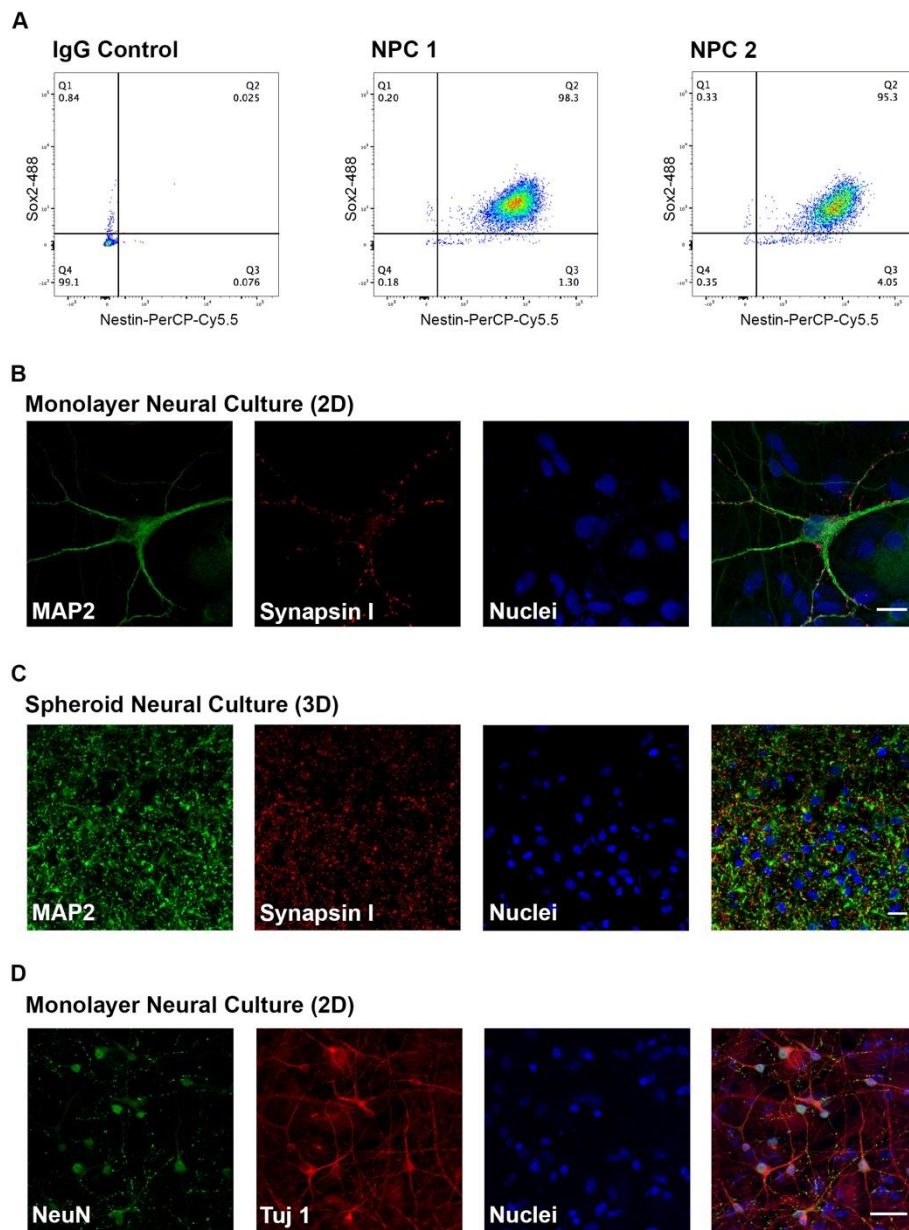

**Supplemental Figure 1**

**Supplemental Figure 1** – Characterization of hiPSC-derived neural cultures. (A) Flow analysis of the two NPC clones used in this study showing co-expression of Sox2 and Nestin in derived progenitor cells. (B-C) Immunocytochemistry (ICC) of 8-week-old 2D (B) and 3D (C) cultures showing the presence of maturity marker Synapsin I (Scale bar = 20  $\mu$ m). (D) ICC of 8-week-old 2D neural cultures showing the presence of Tuj1 and NeuN (Scale bar = 50  $\mu$ m).

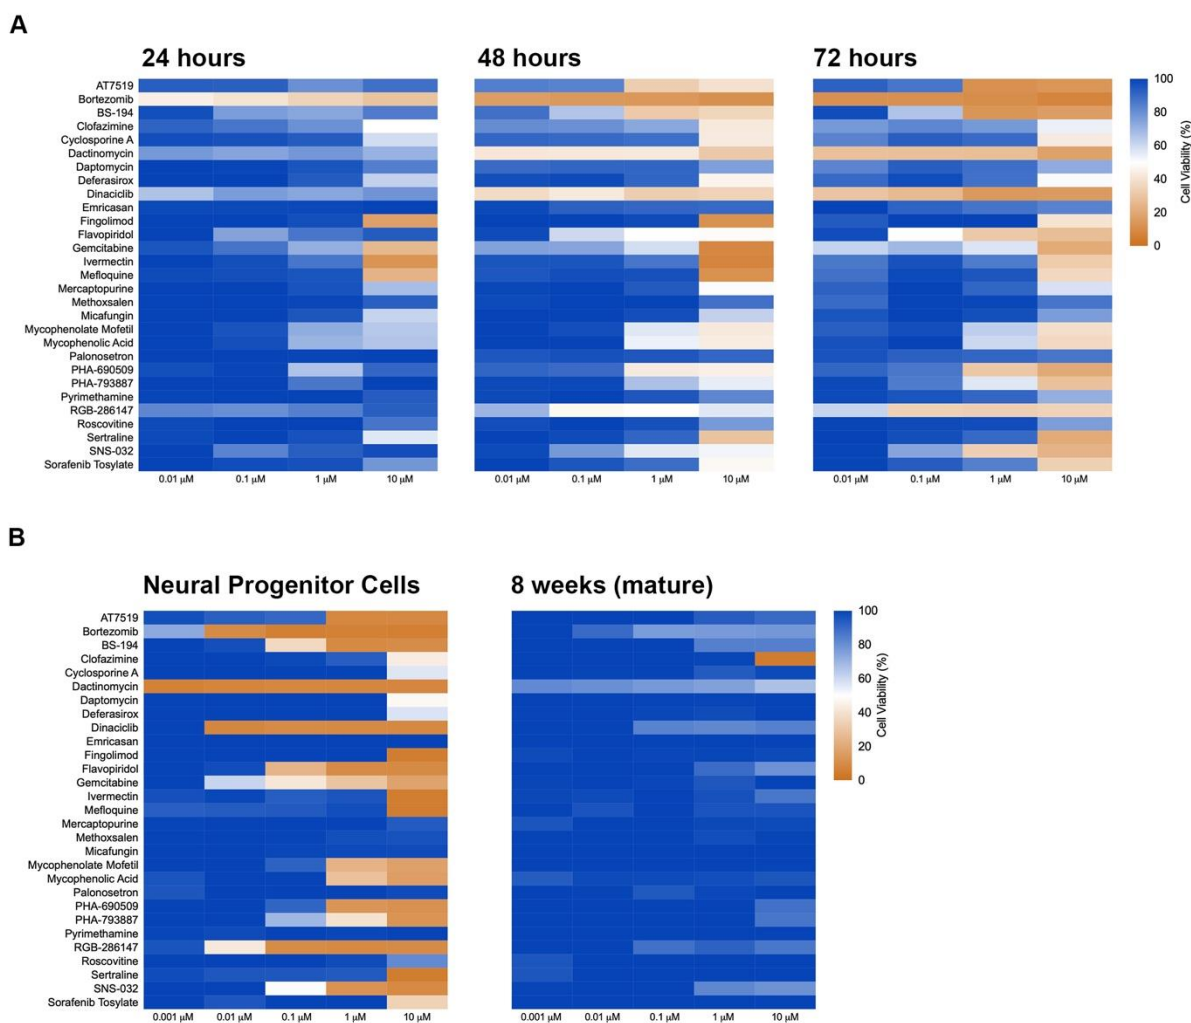

**Supplemental Figure 2**

**Supplemental Figure 2 – Toxicity profile as a function of compound exposure time.** (A) Heat map to determine the optimal compound exposure time. NPCs were exposed to compounds for 24, 48, or 72 hours, and viability was determined using CellTiter-Glo. The exposure time of 72 hours was chosen for all further experiments in this study. (B) Toxicity confirmation using a different hiPSC clone. Human iPSC-derived neural cultures from a second clone at progenitor (NPC) and mature (8-week-old) stages were exposed to compounds for 72 hours, and viability was determined using PrestoBlue. Graphs show heat map for cell viability compared to control (DMSO treated).

#### Monolayer Neural Culture (2D)

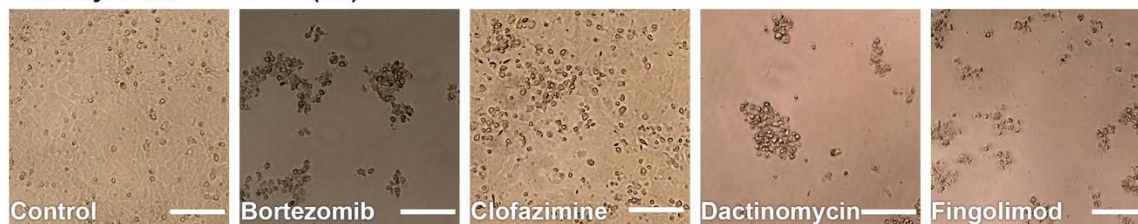

#### Spheroid Neural Culture (3D)

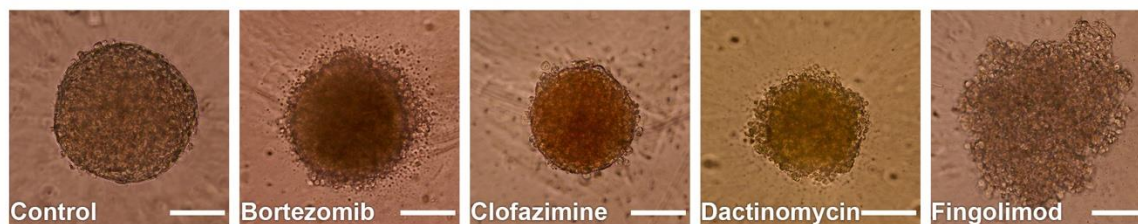

**Supplemental Figure 3**

**Supplemental Figure 3** – Brightfield microscopy images of progenitor cells after compound exposure. Representative images of toxic and non-toxic compounds after 48 hours exposure at 10  $\mu$ M concentration. Monolayer (2D) and spheroid (3D) cultures are shown. Scale bar is 100  $\mu$ m.

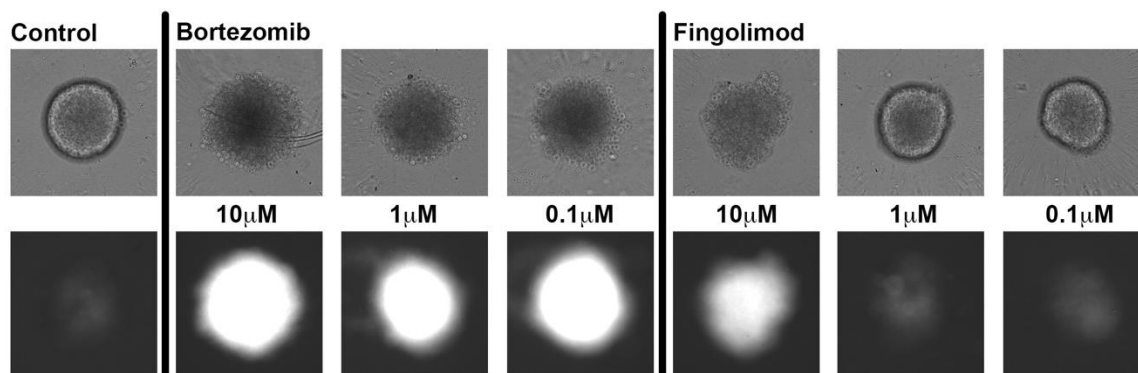

**Supplemental Figure 4**

**Supplemental Figure 4** – Brightfield and fluorescence imaging of spheroids (3D) from the Caspase-3/7 activation assay. Three compound concentrations are shown for two representative compounds. Images taken 48 hours after compound exposure. Fluorescence imaging used to quantify Caspase-3/7 activation relative to control (CellEvent™ reagent).

A

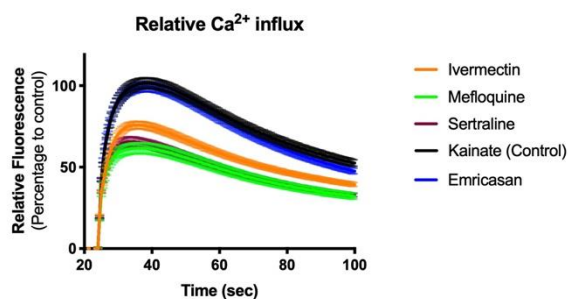

B

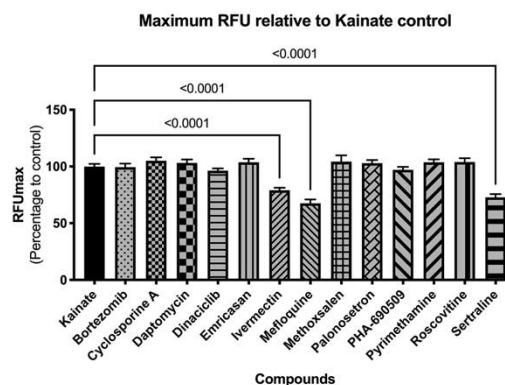

Supplemental Figure 5

**Supplemental Figure 5** – Functional response of 2D neural cultures to kainate stimulus. Graphs show relative fluorescence response over time (A) and maximum relative fluorescence (B) of kainate induced activity. Eight-week-old 2D neural cultures were exposed with selected compounds for 30 minutes before stimulus with kainate and functional response was recorded using FLIPR<sup>TETRA</sup>. Standard deviation is shown in both graphs. Number of replicates per compound = 14.
